# Supplementary figures and images for: Adsorption of charged macromolecules upon multicomponent responsive surfaces
Source: Royal Society of Chemistry journal article supplement (doi:10.1039/c8cp03383h), 2018-01-01

(a)

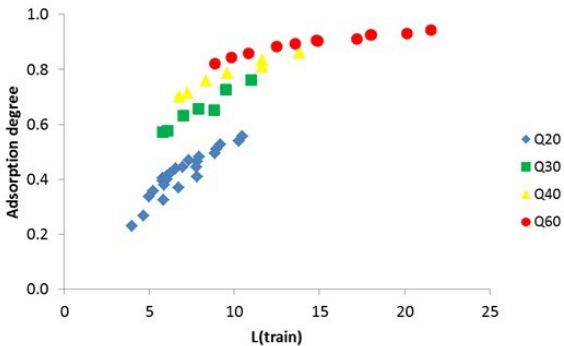

(b)

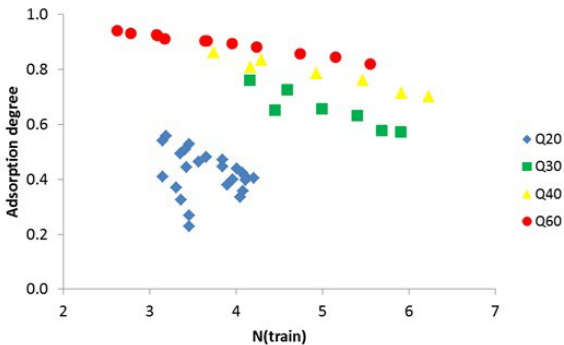

Supplement: c8cp03383h2.pdf [file c8cp03383h2.pdf]
